# Supplementary material
Source: PubMed Central journal article supplement (PMC4925213)

# Supplementary Figure 1 (related to Figure 1)

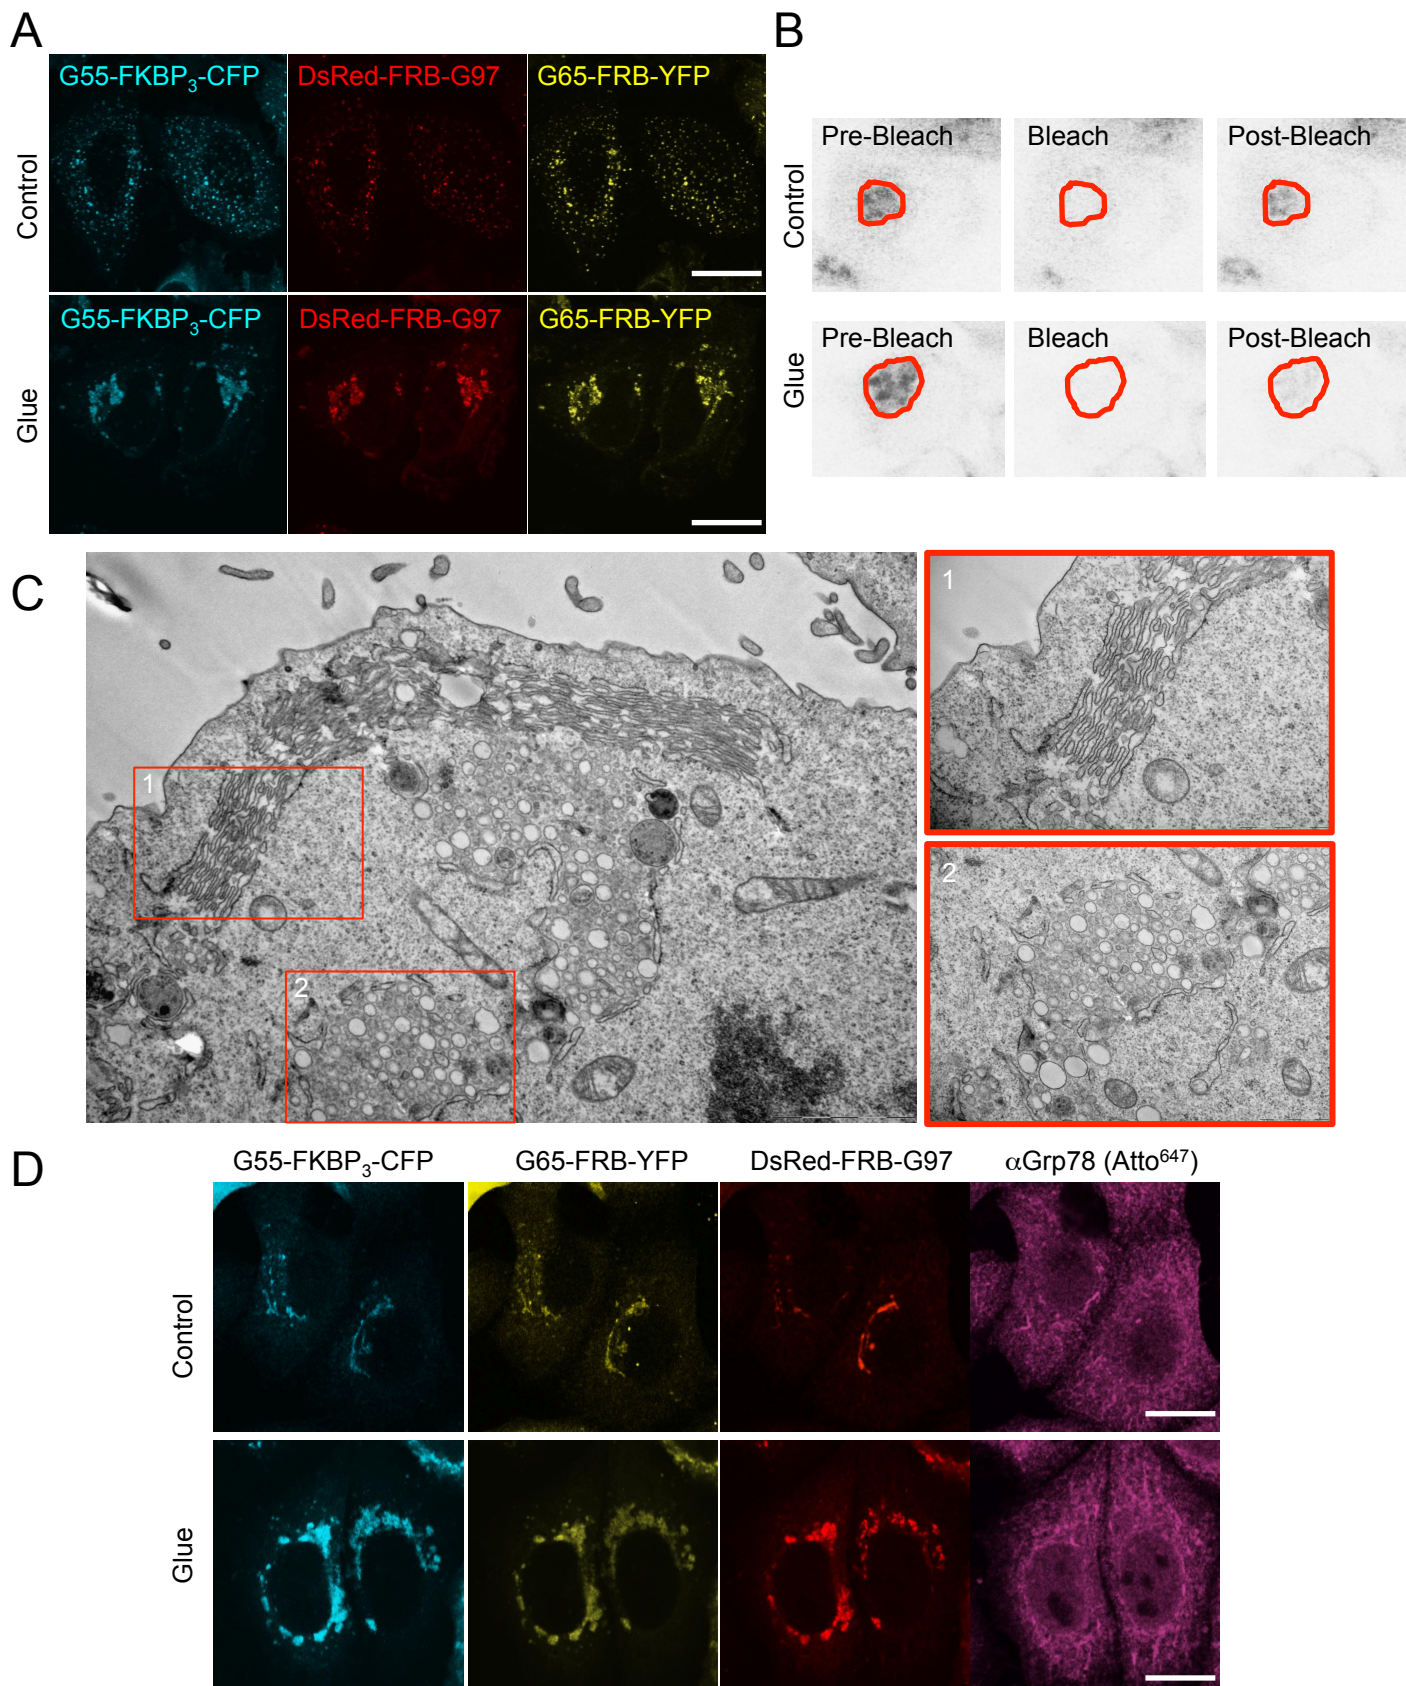

# Supplementary Figure 2 (related to Figure 2)

**A**

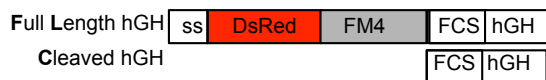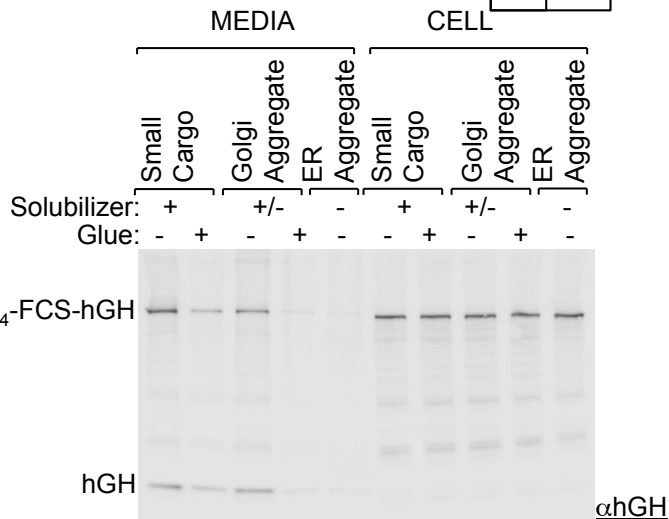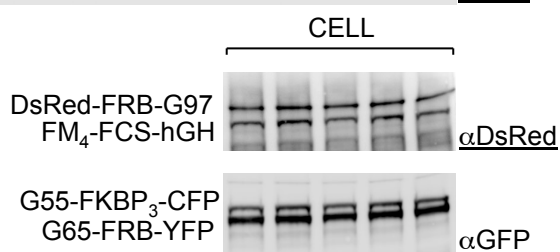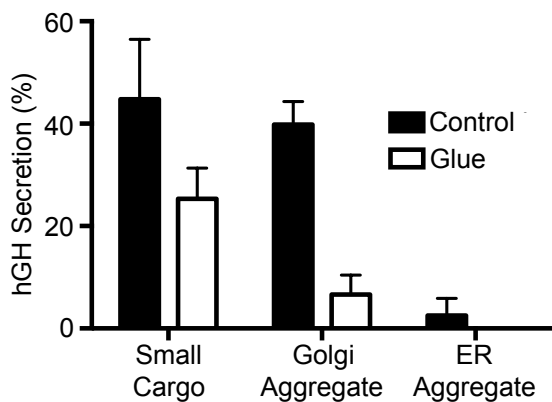

**B**

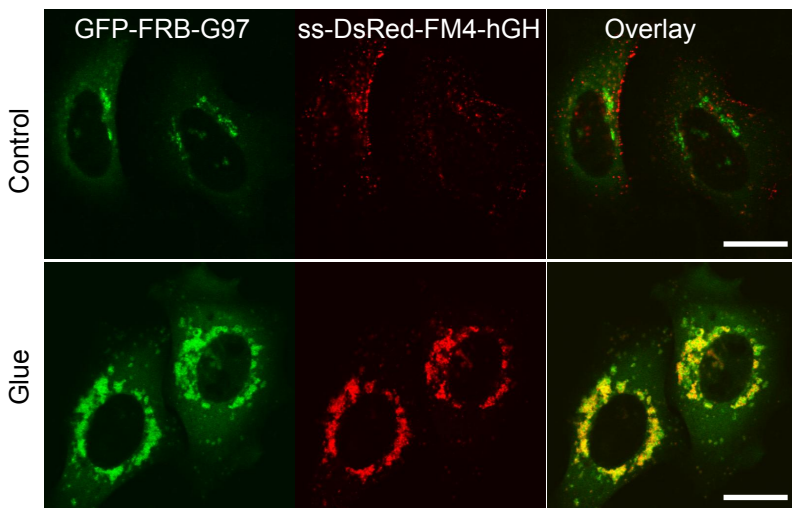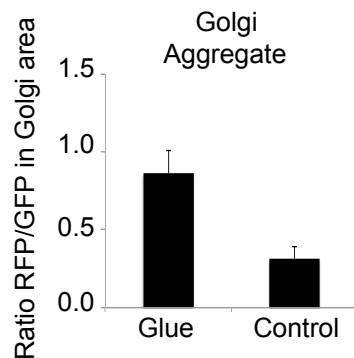

**C**

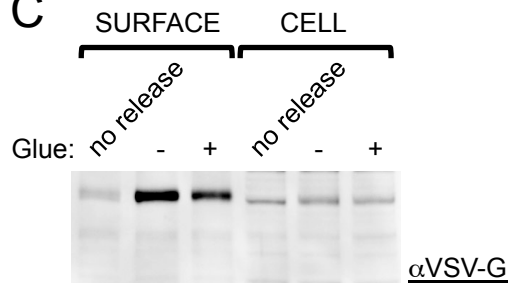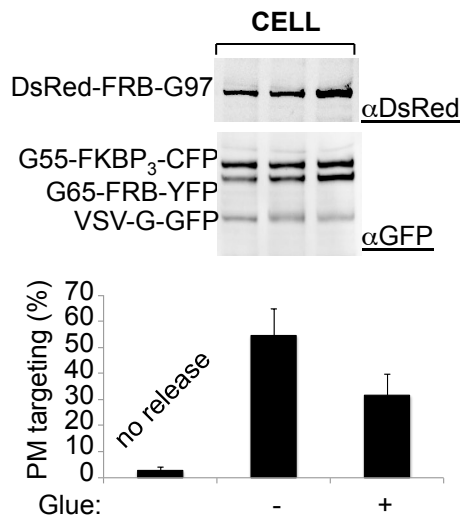

# Supplementary Figure 3 (related to Figure 2)

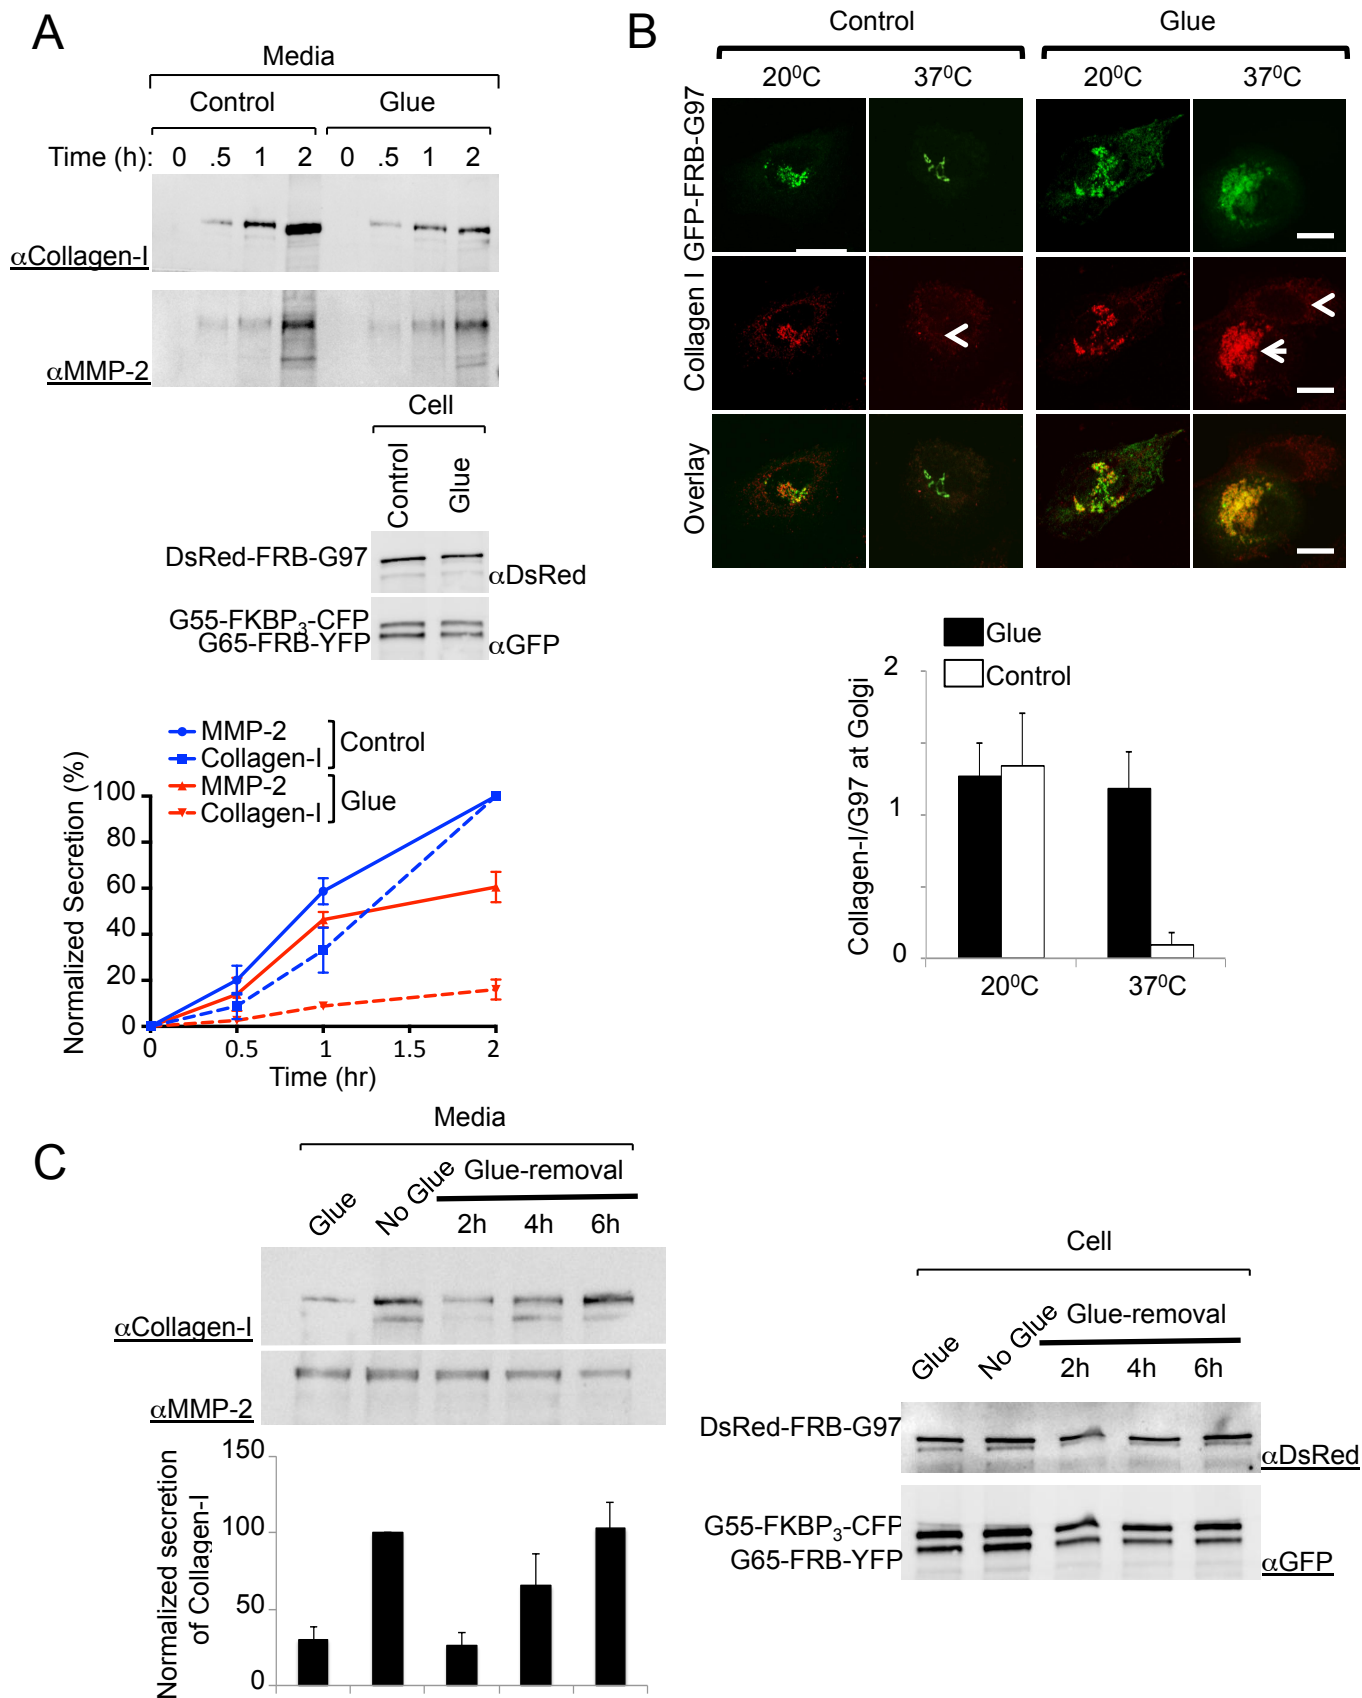

Supplementary Figure 4 (related to Figure 3)

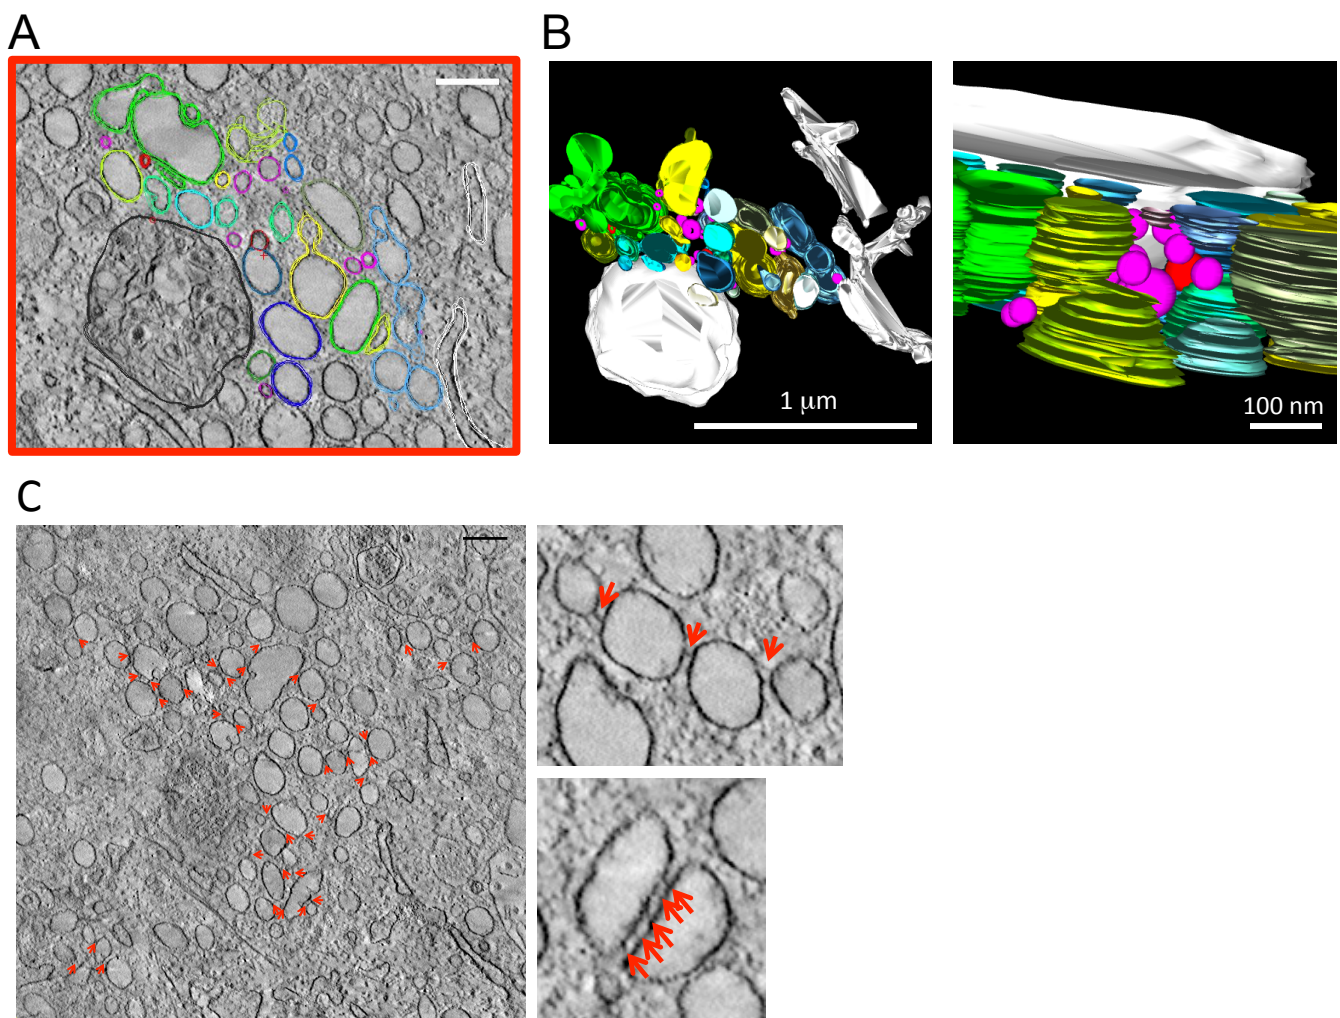

Supplement: NIHMS786821-supplement-02.pdf [file NIHMS786821-supplement-02.pdf]
